# Supplementary material for: Evaluating Imputation Algorithms for Low-Depth Genotyping-By-Sequencing (GBS) Data
Source: PLOS journal article supplement (doi:10.1371/journal.pone.0160733), 2016-08-18

EM imputation

— non C1 parent  
— C1 parent

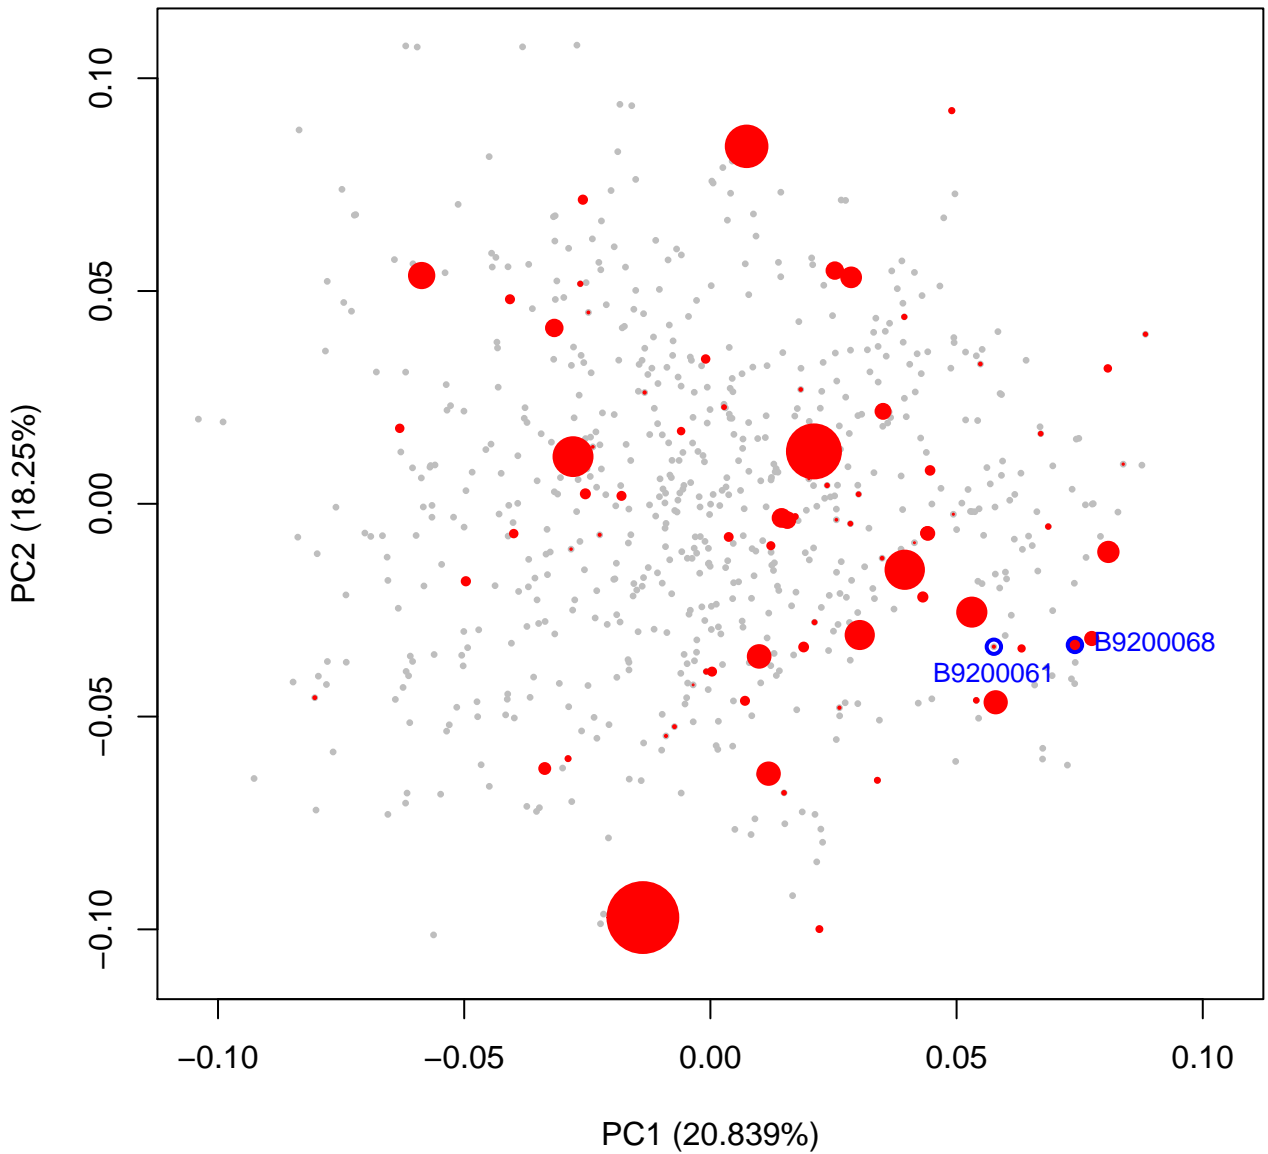

Supplement: S3 (10.1371/journal.pone.0160733.s003) [file journal.pone.0160733.s003]
